# Supplementary material
Source: PubMed Central journal article supplement (PMC3248284)
Supplement: JCI46425sd.pdf [file JCI46425sd.pdf]

**Supplemental Figure 1.** Clinical characteristics of ClinSeq™ participants by rs1260326 genotype. Unadjusted trait values for ClinSeq™ participants separated by *GCKR* genotype for (A) triglycerides and (B) fasting glucose. Red bars = unadjusted means  $\pm$  SD. Two-tailed p-values are compared to WT (see also Supplemental Table 1). WT, individuals homozygous for Pro at position 446; P446L, heterozygous individuals at position 446; L446, individuals homozygous for Leu at position 446.

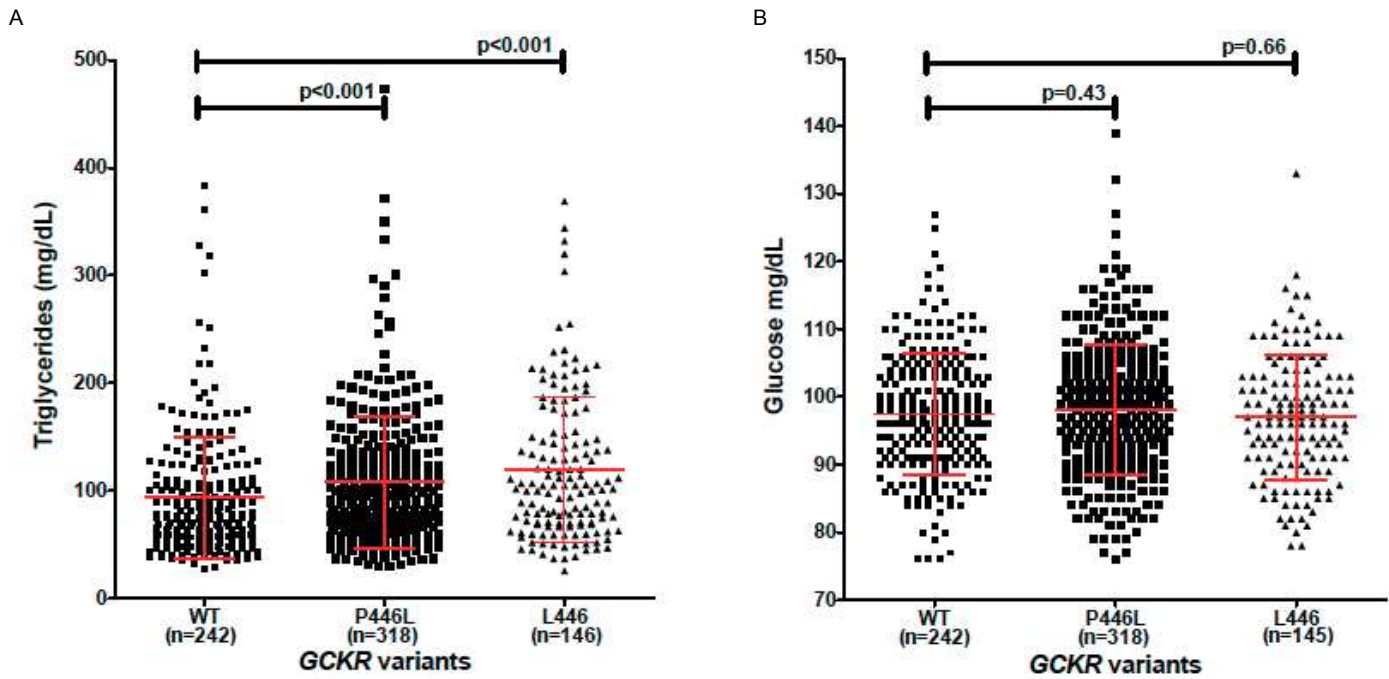

**Supplemental Figure 2.** Protein domains and bacterial homology of GKRP.

(A) The location of ClinSeq™ variants are shown relative to the two sugar isomerase domains (SIS 1 and SIS 2). The boundaries of SIS domains were predicted using a Conserved Domains search (<http://www.ncbi.nlm.nih.gov/Structure/cdd/wrpsb.cgi>). Putative sugar binding motifs (1) within SIS domains are shown as bold lines. Nonsense and frameshift variants are shown in red.

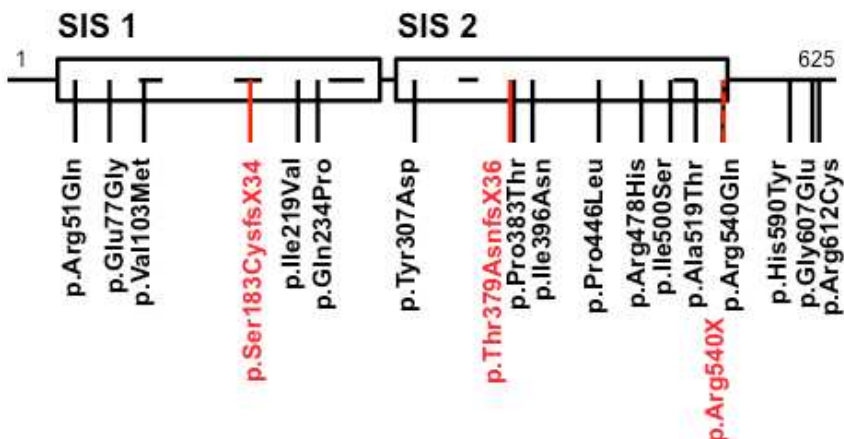

(B) Manual alignment of human GKRP residues 209-278 with *H. influenzae* YfeU residues 162-208 and human GKRP residues 481-519 with YfeU residues 206-244. The predicted secondary structure (2) for human GKRP is shown above the alignment. Secondary structure from the X-ray structure of YfeU is shown below the alignment (3). Conserved residues are in red. Residues that did not align by sequence or structure homology are in lowercase. Predicted sugar binding motifs (1) are identified in green. Ile219, Gln234, and Ile500 are highlighted in yellow. *helix* = *alpha-helical region*; *strand* = *beta-strand region*; *loop* = *neither helix nor sheet*.

```

hGKRP  loop-- -->helix----->          ->  str-loop----->helix----->
      209  NPVSMARndpIedwsstfrqvaermqkmq  EKQKAFVLNPAI  GPEGLSGSSRMKGGSATKILLETLLAAH
      162  NPKSAA                               SEIADIAIETIV  GPEILTGSSRLKAGTAQKMVLNMLSTASM
YfeU   loop--                               ---->str-loop----->helix----->
                                           motif C----->
  
```

```

hGKRP
  481  STKWVLTIVSTGAHVLLGKILQNHMLDLRISNSKLFWRA
  206  AQKMLNMLTTASMI LLGKCYENLMVDVQASNEKLRARA
YfeU                                     motif E----->
  
```

(C) Helical wheel diagram of human GKRP residues 218-236. Ile219 and Gln234 are boxed in black.

*yellow circles* = *hydrophobic residues*; *blue circles* = *polar uncharged residues*; *green* = *positively charged residues*; *purple* = *negatively charged residues*; *red* = *residue unfavorable for helix formation*

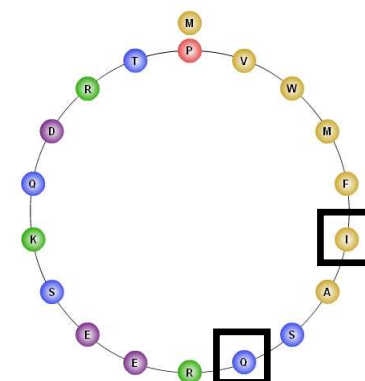

Image generated from:

[http://www-nmr.cabm.rutgers.edu/bioinformatics/Proteomic\\_tools/Helical\\_wheel/](http://www-nmr.cabm.rutgers.edu/bioinformatics/Proteomic_tools/Helical_wheel/)

**Supplemental Figure 3.** Fluorescence imaging of YFP-GKRP variants with and without co-expression of CFP-GCK.

All images are representative of transfections performed at least twice from two independent plasmid preparations per variant. Images were taken at 63x magnification using the same laser settings and intensity.

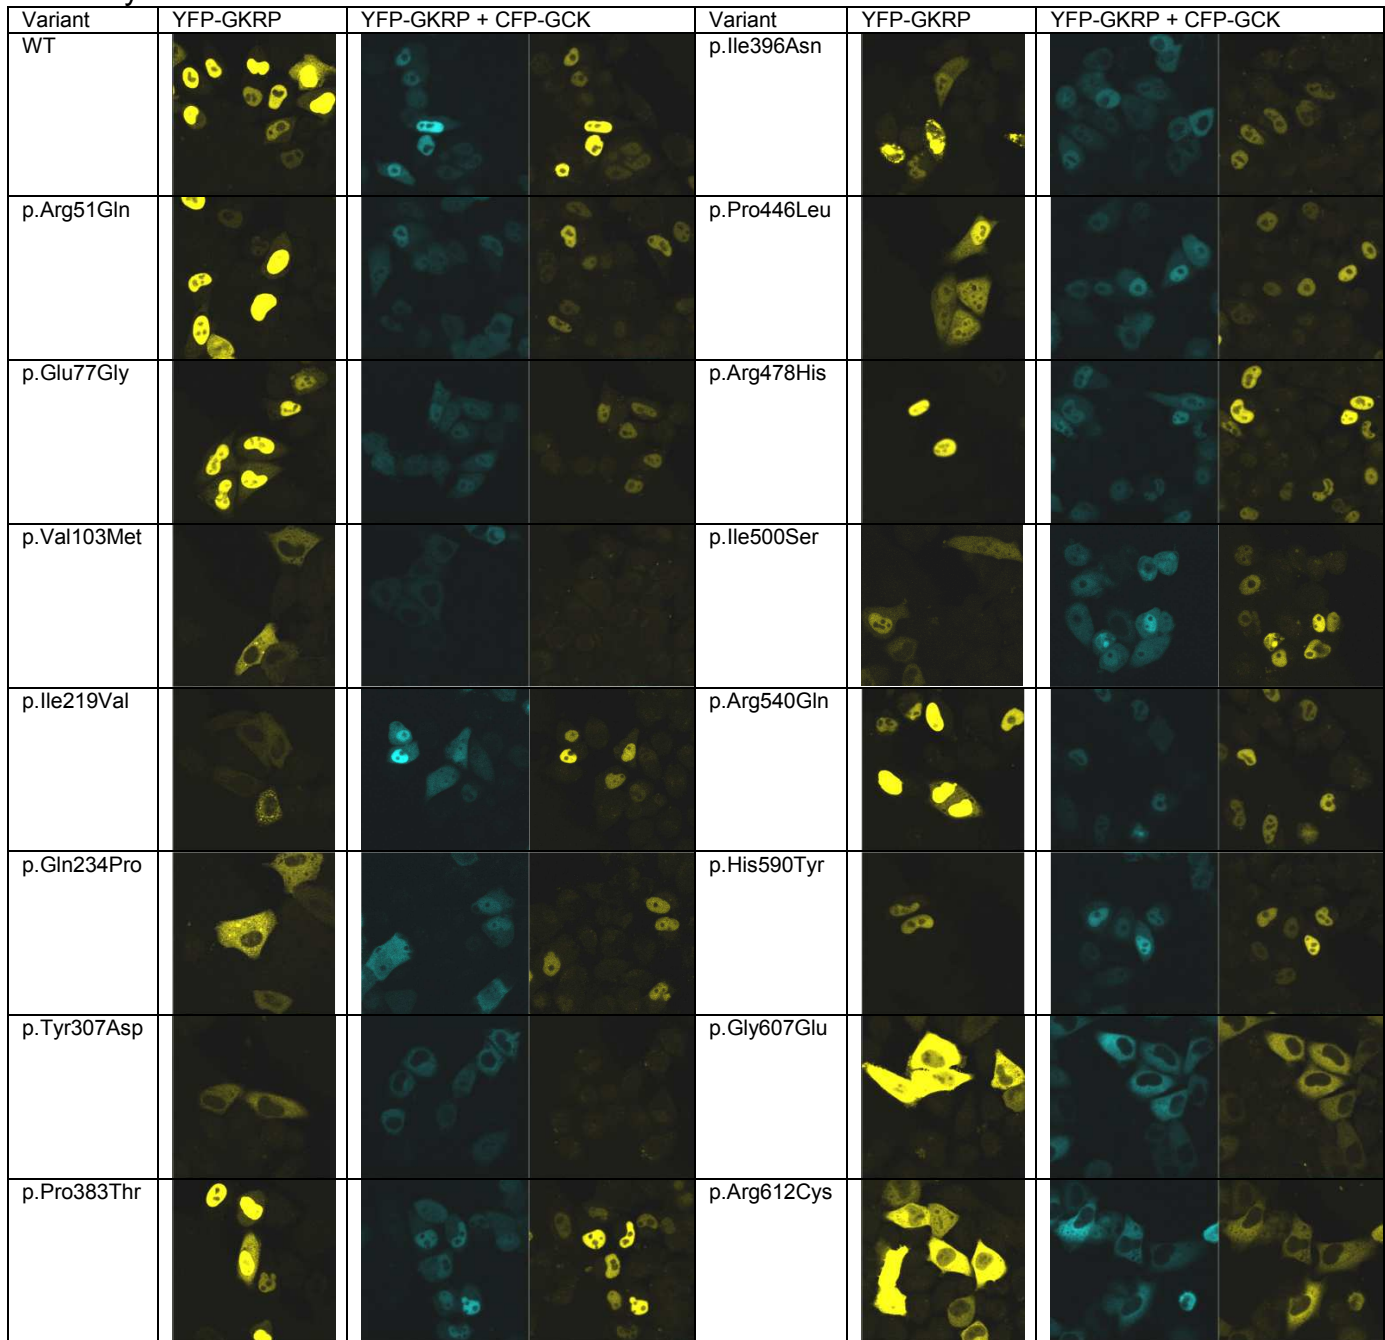

**Supplemental Figure 4.** Effect of Leu446 in *cis* on rare variants p.Glu77Gly, p.Pro383Thr, and p.Arg540Gln.

p.[Glu77Gly; Pro446Leu] and p.[Pro383Thr; Pro446Leu] showed near-complete cytoplasmic expression while p.[Pro446Leu; Arg540Gln] showed mixed nuclear and cytoplasmic localization similar to p.Pro446Leu alone. All images were taken at 63x magnification using the same laser settings and intensity and are representative of at least two transfections of two independent plasmid preparations for each variant.

p.[Glu77Gly; Pro446Leu]

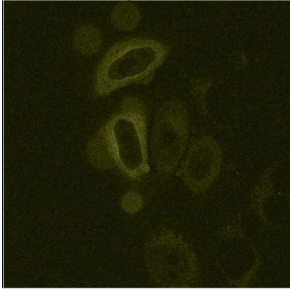

p.[Pro383Thr; Pro446Leu]

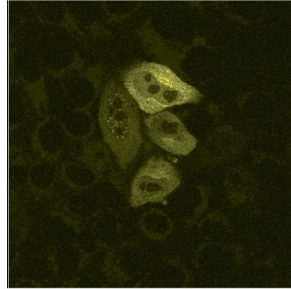

p.[Pro446Leu; Arg540Gln]

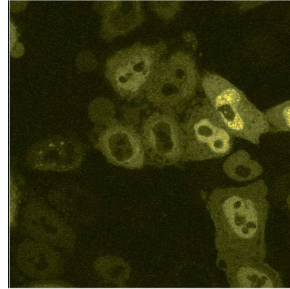

**Supplemental Figure 5.** Transient transfection of a plasmid containing YFP-tagged *Xenopus laevis* GKRP and CFP-tagged human liver GCK in HeLa cells.

*Xenopus* GKRP (*right*) localized primarily to the nucleus after 72 hours and was competent to sequester human GCK (*left*) to some degree. The image was taken at 63x magnification using the same laser settings and intensity as in Supplemental Figure 3.

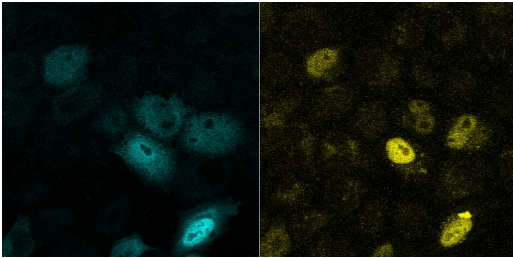

**Supplemental Figure 6.** Effect of glucose on 10  $\mu$ M GSK3 $\alpha$  in the absence and presence of one unit of WT and variant GSK3 $\alpha$  proteins.

No significant difference was observed between (A) WT GSK3 $\alpha$  and p.Arg612Cys-GSK3 $\alpha$  ( $p > 0.05$  and  $n = 12$ ), (B) WT GSK3 $\alpha$  and p.Pro383Thr-GSK3 $\alpha$  ( $p > 0.05$  and  $n = 6$ ), (C) WT GSK3 $\alpha$  and p.Ile219Val-GSK3 $\alpha$  ( $p > 0.05$  and  $n = 6$ ), (D) WT GSK3 $\alpha$  and p.Ile500Ser-GSK3 $\alpha$  ( $p > 0.05$  and  $n = 6$ ) and (E) WT GSK3 $\alpha$  and p.Gln234Pro-GSK3 $\alpha$  ( $p > 0.05$  and  $n = 42$ ). GSK3 $\alpha$  activity is plotted as a percentage of that obtained in the absence of regulatory protein at 100 mM glucose. Data points are mean  $\pm$  SEM.

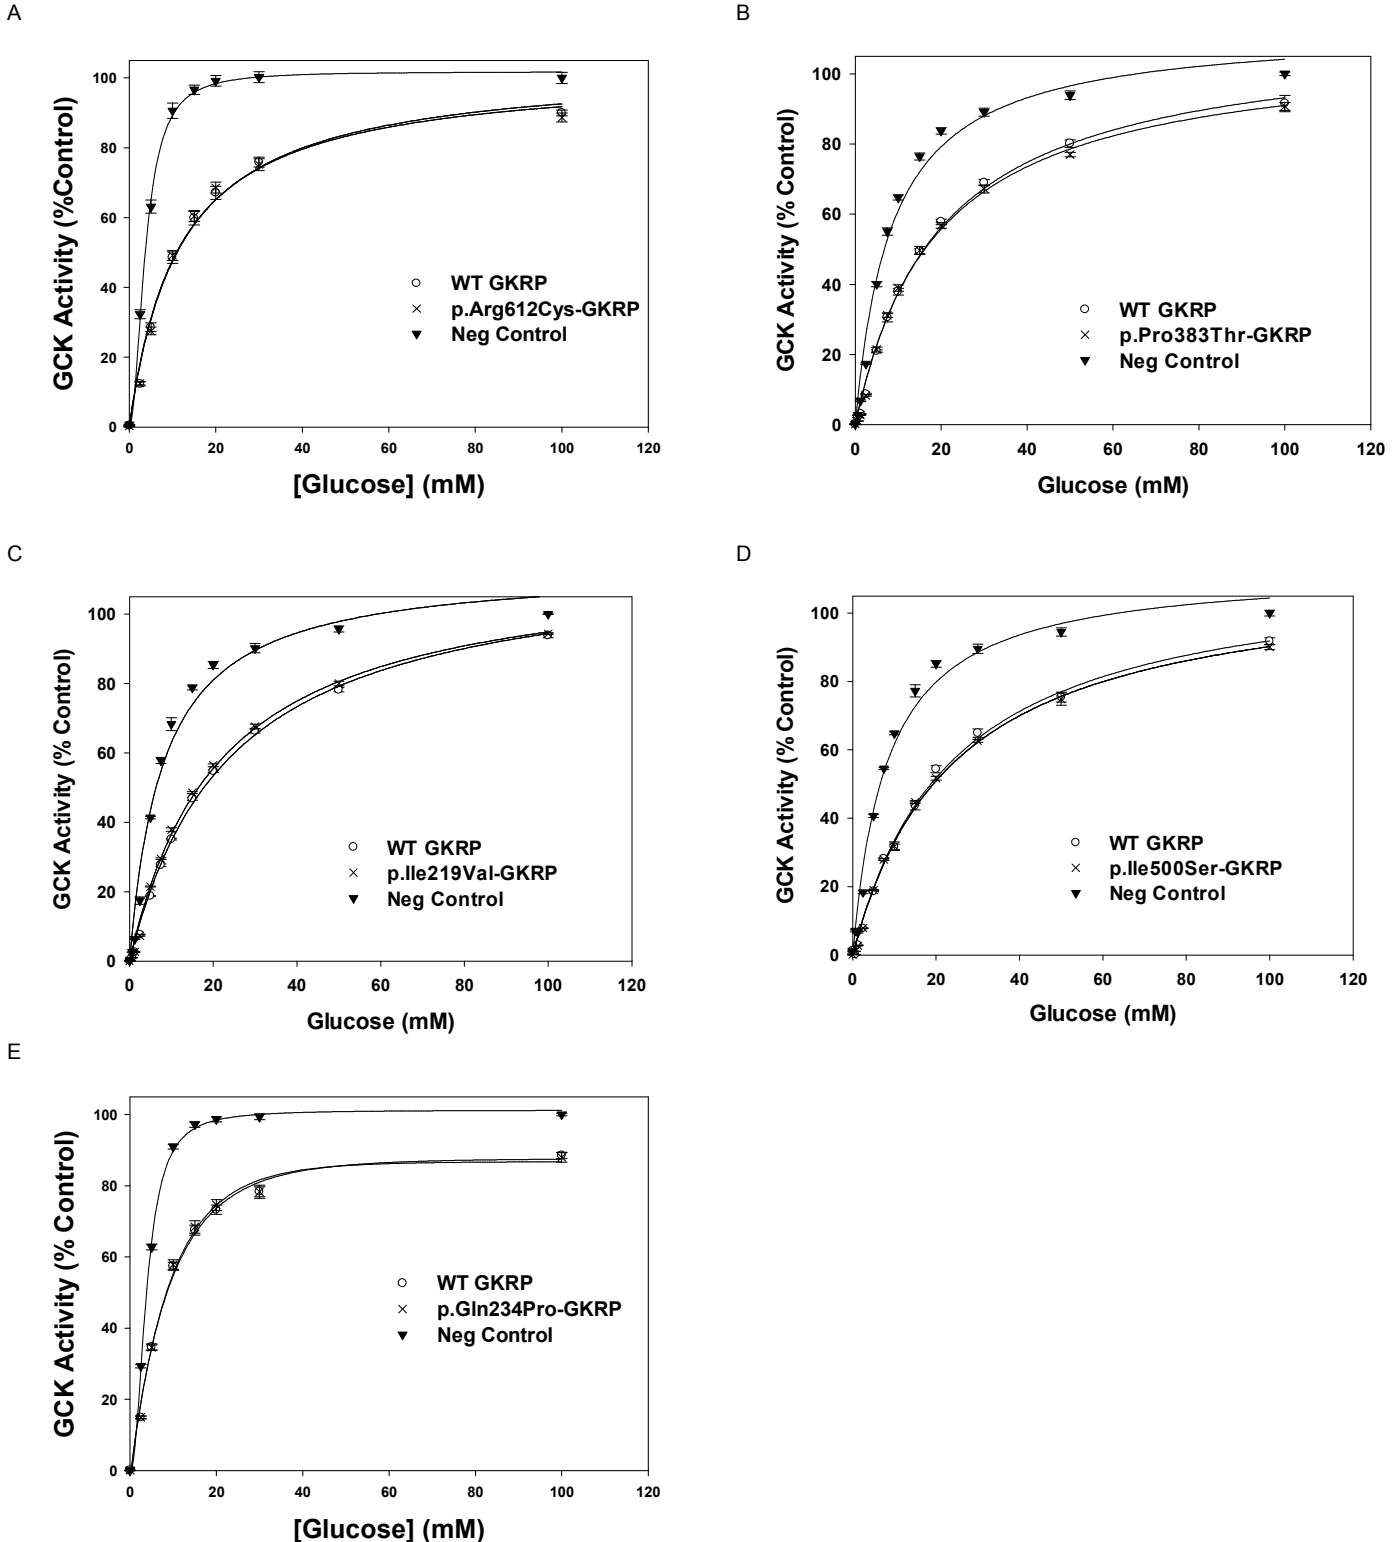

**Supplemental Figure 7.** Assessment of the p.Pro383Thr variant in conjunction with p.Pro446Leu.

(A) Activity comparisons of p.Pro383Thr-GKRP and p.[Pro383Thr; Pro446Leu]-GKRP. (B) Response of p.[Pro383Thr; Pro446Leu]-GKRP to F1P and F6P in comparison to p.Pro446Leu-GKRP. GCK activity is plotted as a percentage of that obtained in the absence of regulatory protein at 5 mM glucose. Data points are mean  $\pm$  SEM. \*  $p < 0.05$ ; \*\*  $p < 0.01$ ; \*\*\*  $p < 0.001$

A

| Protein                  | Protein activity ( $\mu\text{g/ml}$ ) |
|--------------------------|---------------------------------------|
| Wild-type                | 2.85                                  |
| p.Pro446Leu              | 3.24                                  |
| p.Pro383Thr              | 3.00                                  |
| p.[Pro383Thr; Pro446Leu] | 4.13                                  |

B

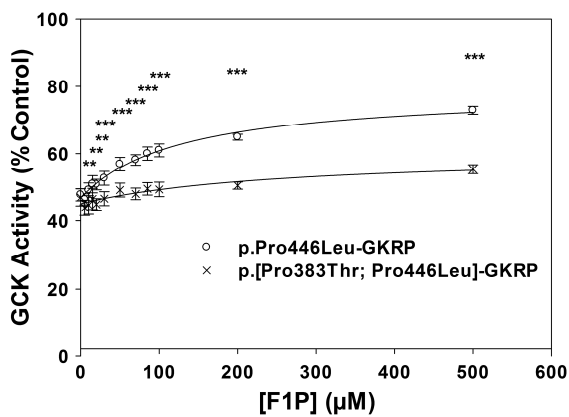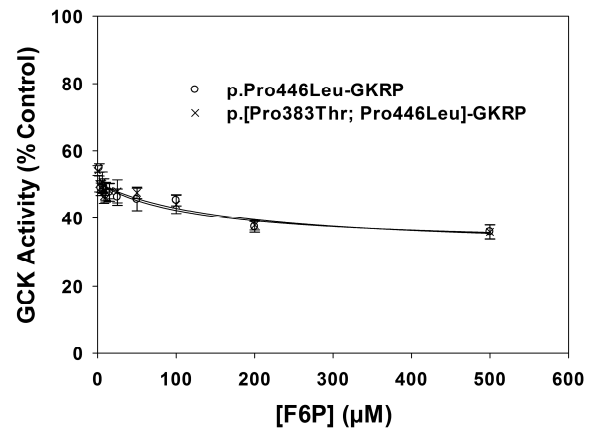

**Supplemental Figure 8.** Lipid levels of ClinSeq™ participants by *GCKR* genotype. Unadjusted trait values for ClinSeq™ participants separated by *GCKR* genotype for (A) triglycerides, (B) total cholesterol and (C) LDL cholesterol. Red bars = unadjusted means  $\pm$  SD. Two-tailed p-values are compared to WT (see also Table 3). *WT*, individuals homozygous for Pro at position 446; *P446L*, heterozygous individuals at position 446; *L446*, individuals homozygous for Leu at position 446; *rare*, individuals heterozygous for one or more rare *GCKR* nonsynonymous variants; *WT-like*, individuals heterozygous for rare *GCKR* nonsynonymous variants with cellular localization indistinguishable from wild-type; *LOF*, individuals heterozygous for rare *GCKR* nonsynonymous variants with predicted or observed cellular localization defect, reduced protein expression, and/or a kinetic defect.

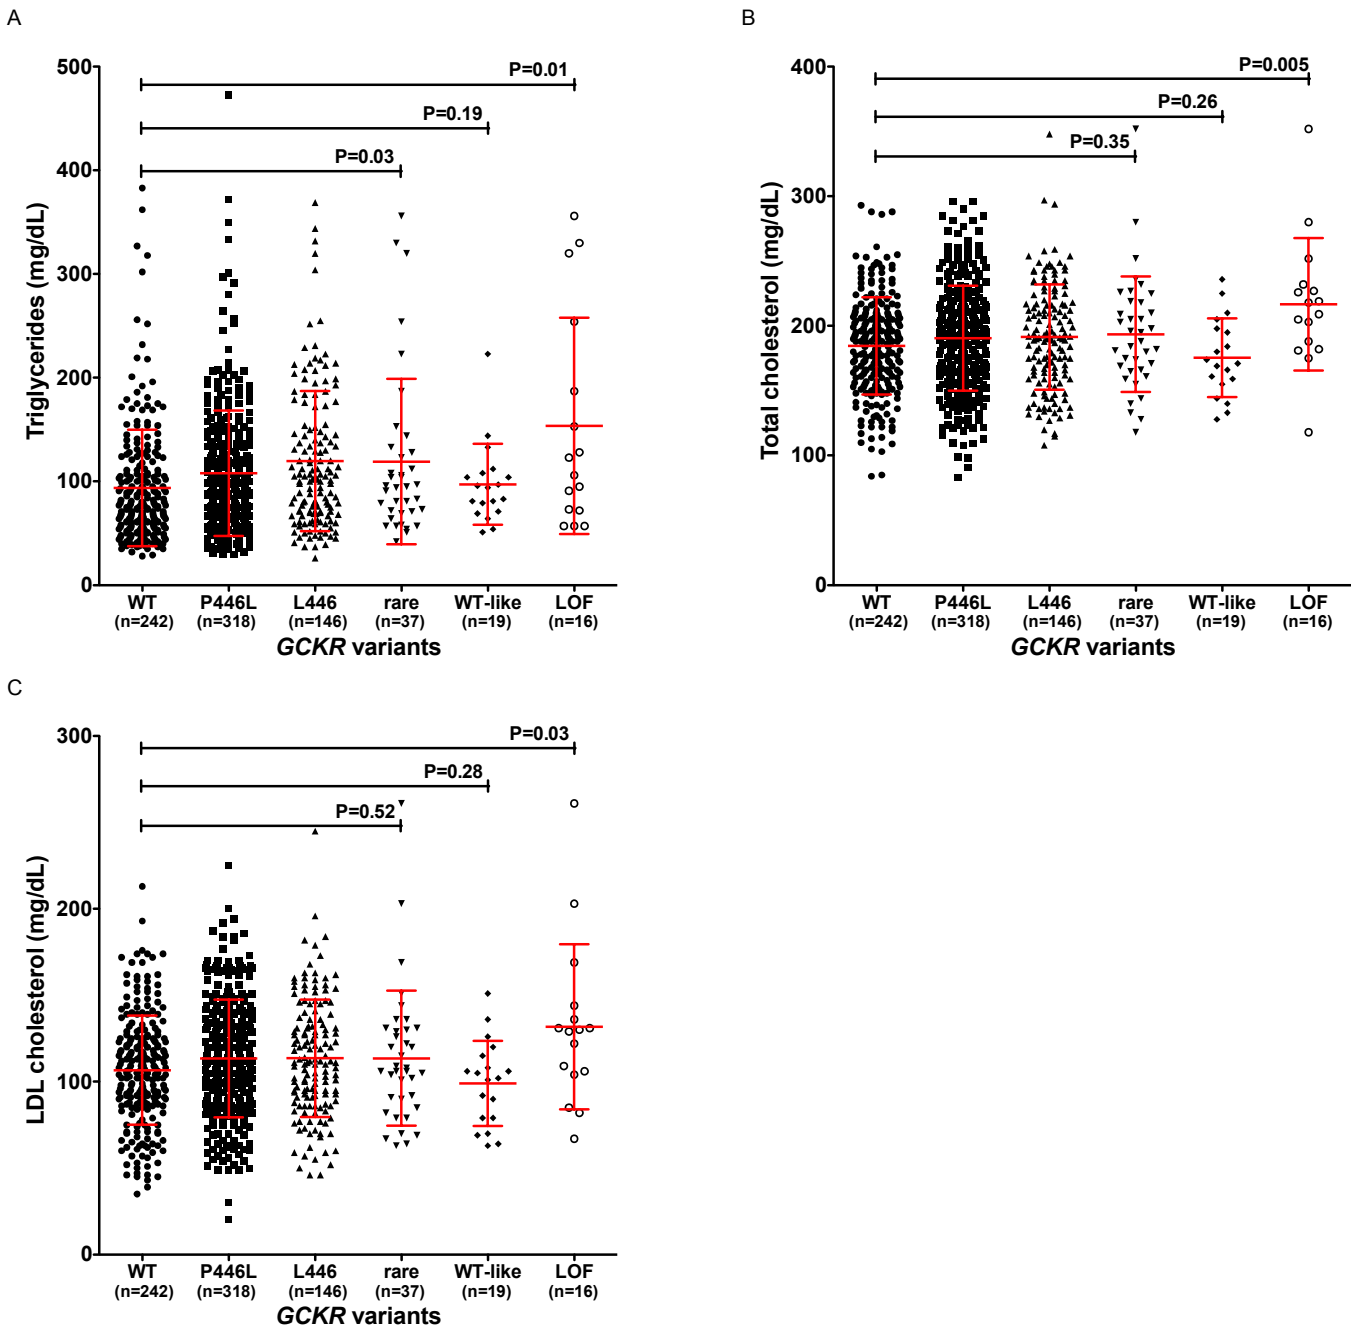



**Supplemental Figure 9.** Further separation of rare *GCKR* variants by biochemical effect. Unadjusted trait values for ClinSeq™ participants separated by *GCKR* genotype for triglycerides, total cholesterol, BMI and fasting insulin. Red bars = unadjusted means. *GOF*, individuals heterozygous for a putative C-terminal gain-of-function rare *GCKR* nonsynonymous variant; *WT-like*, individuals heterozygous for rare *GCKR* nonsynonymous variants with cellular localization indistinguishable from wild-type; *mild LOF*, individuals heterozygous for rare *GCKR* nonsynonymous variants with a cellular localization defect, reduced protein expression, and/or a kinetic defect; *severe LOF*, individuals heterozygous for rare *GCKR* nonsynonymous variants with most severe effects on protein expression and/or kinetic parameters (*p.Val103Met*, *p.[Ser183CysfsX34; Ala519Thr]*, *p.[Gln234Pro; Arg540X]*, *p.Tyr307Asp*, *p.Thr379AsnfsX36*, *p.Pro383Thr*, *p.Ile500Ser*)

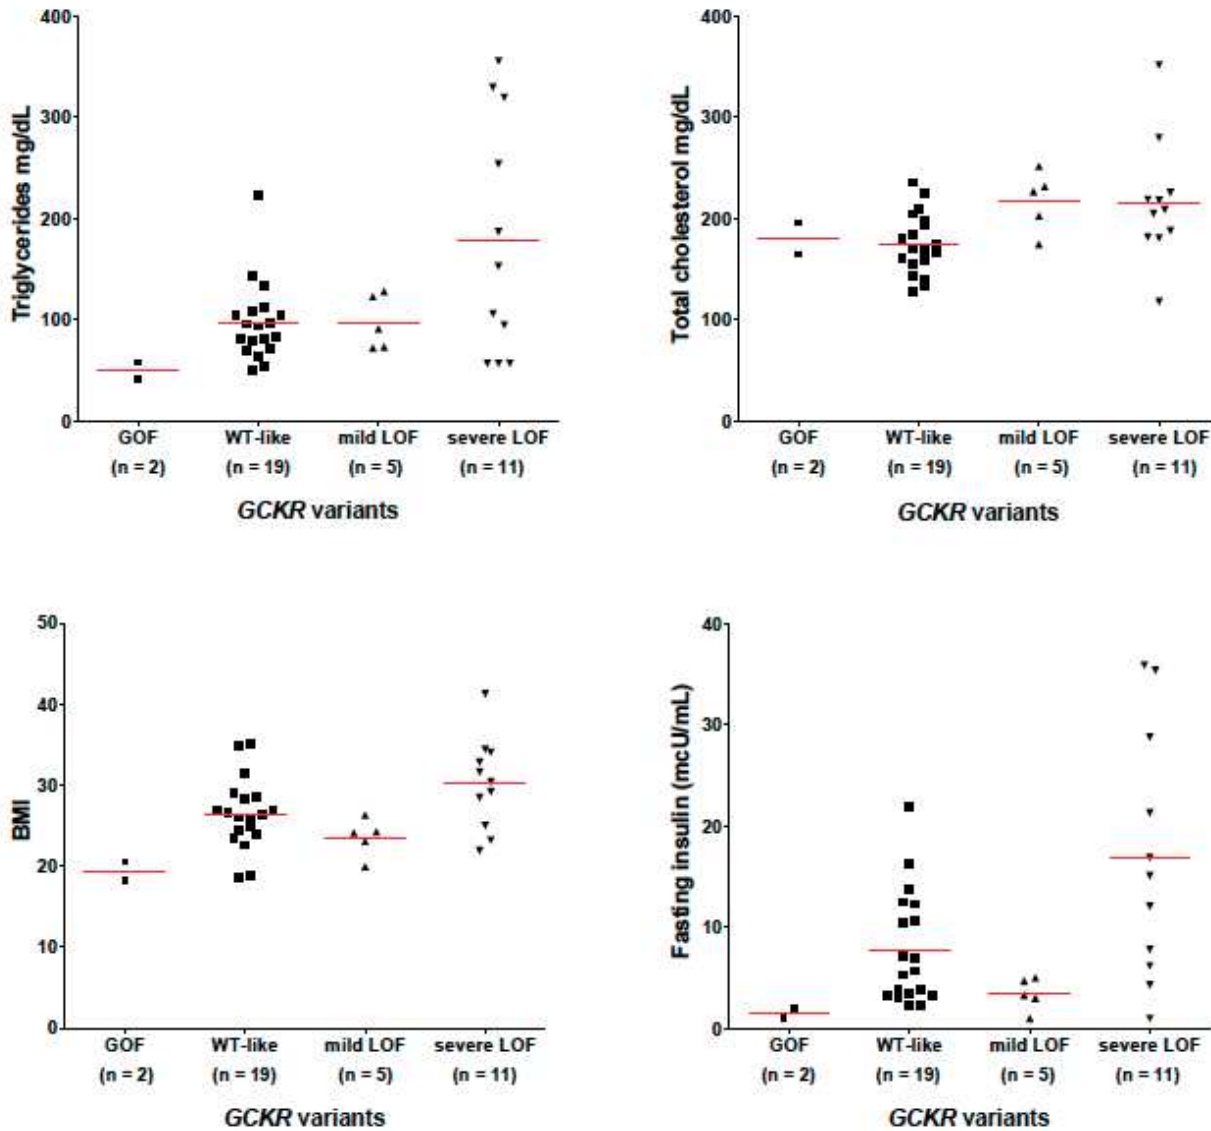

**Supplemental Table 1.** Selected mean baseline clinical characteristics of ClinSeq™ individuals separated by rs1260326 genotype

| Clinical features         | <i>GCKR</i> WT<br>mean±SD<br>n = 242 | <i>GCKR</i> P446L<br>mean±SD<br>n = 318 | <i>GCKR</i> L446<br>mean±SD<br>n = 146 | P446L vs WT<br>P (2-tailed) | L446 vs WT<br>P (2-tailed) |
|---------------------------|--------------------------------------|-----------------------------------------|----------------------------------------|-----------------------------|----------------------------|
| Age (years)               | 56.6±5.5                             | 56.0±5.6                                | 56.2±5.6                               | 0.23                        | 0.49                       |
| Sex (% female)            | 55.8%                                | 52.8%                                   | 55.5%                                  | 0.49                        | 1.00                       |
| T2D exclusion (%)         | 8.3%                                 | 5.4%                                    | 4.6%                                   | 0.19                        | 0.17                       |
| BMI (kg/m <sup>2</sup> )  | 27.0±4.5                             | 27.0±4.9                                | 27.3±5.3                               | 0.79                        | 0.75                       |
| Fasting glucose (mg/dL)   | 97.4±9.0                             | 98.1±9.7                                | 97.0±9.2                               | 0.43                        | 0.66                       |
| Fasting insulin (mcU/mL)  | 8.9±6.3                              | 9.3±7.1                                 | 8.8±6.6                                | 1.00                        | 0.67                       |
| C-peptide (ng/mL)         | 2.2±1.1                              | 2.3±1.2                                 | 2.2±1.2                                | 0.73                        | 0.79                       |
| CRP (mg/dL)               | 0.21±0.31                            | 0.26±0.46                               | 0.25±0.27                              | 0.15                        | 0.05                       |
| Total cholesterol (mg/dL) | 184.6±37.5                           | 190.5±40.5                              | 191.4±40.6                             | 0.09                        | 0.15                       |
| HDL cholesterol (mg/dL)   | 60.0±16.3                            | 58.0±16.5                               | 56.7±15.8                              | 0.13                        | 0.07                       |
| LDL cholesterol (mg/dL)   | 106.7±31.6                           | 113.4±34.0                              | 113.6±34.0                             | 0.04                        | 0.08                       |
| Triglycerides (mg/dL)     | 93.8±56.2                            | 108.0±60.5                              | 119.6±67.6                             | <0.001                      | <0.001                     |

*GCKR* subgroups were defined as: *GCKR* WT (individuals who are homozygous for Pro at position 446), *GCKR* P446L (individuals who are heterozygous for p.Pro446Leu), and *GCKR* L446 (individuals who are homozygous for Leu at position 446). Fisher's exact test was used to compare differences in frequency distribution of sex and prevalence of type 2 diabetes among the *GCKR* subgroups. The Mann-Whitney U test was used for pairwise comparison of unadjusted means in all other clinical variables among the *GCKR* subgroups. Individuals with potential familial hyperlipidemia and those with type 2 diabetes were excluded from phenotype analysis.

**Supplemental Table 2.** p.Pro446Leu genotype and phase of Leu446 for individuals with rare *GCKR* variants.

| Amino acid change                         | Number of individuals | p.Pro446Leu genotype    | Leu446 phase   |
|-------------------------------------------|-----------------------|-------------------------|----------------|
| p.Arg51Gln                                | 4                     | 3 Pro/Pro<br>1 Pro/Leu  | Trans          |
| p.Glu77Gly                                | 1                     | Leu/Leu                 | Cis            |
| p.Val103Met                               | 2                     | 2 Pro/Leu               | Trans          |
| p.[Ser183CysfsX34; Ala519Thr]             | 3                     | 2 Pro/Pro<br>1 Pro/Leu  | Trans          |
| p.[Ser183CysfsX34; Ala519Thr];[Arg540Gln] | 1                     | Pro/Leu                 | Trans          |
| p.Ile219Val                               | 1                     | Pro/Leu                 | <b>Unknown</b> |
| p.Gln234Pro                               | 3                     | Pro/Pro                 |                |
| p.[Gln234Pro; Arg540X]                    | 1                     | Pro/Leu                 | Trans          |
| p.[Tyr307Asp(;)Arg540Gln]                 | 1                     | Pro/Leu                 | <b>Unknown</b> |
| p.Thr379AsnfsX36                          | 2                     | 2 Pro/Leu               | Trans          |
| p.Pro383Thr                               | 1                     | Pro/Leu                 | Cis            |
| p.Ile396Asn                               | 1                     | Pro/Leu                 | Trans          |
| p.Arg478His                               | 1                     | Pro/Pro                 |                |
| p.Ile500Ser                               | 1                     | Pro/Leu                 | <b>Unknown</b> |
| p.Arg540Gln                               | 15                    | 12 Pro/Leu<br>3 Leu/Leu | Cis            |
| p.His590Tyr                               | 2                     | 2 Pro/Leu               | <b>Unknown</b> |
| p.Gly607Glu                               | 1                     | Pro/Pro                 |                |
| p.Arg612Cys                               | 1                     | Pro/Leu                 | Trans          |

**Supplemental Table 3.** Mammalian conservation of *GCKR* variants from the ClinSeq™ project.

|                       | p.Arg51Gln | p.Glu77Gly | p.Val103Met | p.Ile219Val | p.Gln234Pro | p.Tyr307Asp | p.Pro383Thr | p.Ile396Asn | p.Pro446Leu | p.Arg478His | p.Ile500Ser | p.Arg540Gln | p.His590Tyr | p.Gly607Glu | p.Arg612Cys |
|-----------------------|------------|------------|-------------|-------------|-------------|-------------|-------------|-------------|-------------|-------------|-------------|-------------|-------------|-------------|-------------|
| <i>P. troglodytes</i> | R          | E          | V           | I           | Q           | Y           | P           | I           | P           | R           | I           | R           | H           | G           | R           |
| <i>P. abelii</i>      | R          | E          | V           | I           | Q           | Y           | P           | I           | P           | R           | I           | R           | H           | G           | R           |
| <i>M. mulatta</i>     | R          | E          | V           | I           | Q           | Y           | P           | I           | P           | R           | I           | R           | H           | G           | R           |
| <i>A. melanoleuca</i> | R          | E          | V           | I           | Q           | Y           | P           | I           | P           | H           | I           | Q           | Q           | G           | R           |
| <i>C. familiaris</i>  | R          | E          | V           | I           | Q           | Y           | P           | I           | P           | H           | I           | Q           | H           | G           | R           |
| <i>E. caballus</i>    | Q          | D          | V           | I           | Q           | Y           | P           | I           | P           | H           | I           | Q           | H           | G           | R           |
| <i>O. cuniculus</i>   | Q          | E          | V           | I           | Q           | Y           | P           | I           | P           | R           | I           | Q           | H           | G           | R           |
| <i>M. musculus</i>    | Q          | E          | V           | I           | Q           | Y           | P           | V           | P           | R           | I           | Q           | R           | G           | R           |
| <i>R. norvegicus</i>  | K          | E          | V           | I           | Q           | Y           | P           | I           | P           | R           | I           | Q           | R           | G           | R           |

Sequences are from protein BLAST (<http://blast.ncbi.nlm.nih.gov/Blast.cgi>) of human GKR (accession no. Q14397). All mammalian species with full-length alignments to human GKR are shown. In cases where more than one sequence aligned per species, only the sequence with highest homology was selected. Mammalian species were chosen because non-mammalian homologues (as is the case for *Xenopus laevis* GKR) may not respond to phosphate esters F1P and F6P.

**Supplemental Table 4.** Comparison of biochemical defects with SIFT and PolyPhen predictions of human missense variant severity.

| Variant     | SIFT prediction         | PolyPhen prediction | Functional assessment | Agreement |
|-------------|-------------------------|---------------------|-----------------------|-----------|
| p.Arg51Gln  | Tolerated               | benign              | Benign                | BOTH      |
| p.Glu77Gly  | Tolerated               | benign              | Benign                | BOTH      |
| p.Val103Met | affect protein function | probably damaging   | Damaging              | BOTH      |
| p.Ile219Val | Tolerated               | benign              | Damaging              | NEITHER   |
| p.Gln234Pro | Tolerated               | possibly damaging   | Damaging              | PolyPhen  |
| p.Tyr307Asp | affect protein function | probably damaging   | Damaging              | BOTH      |
| p.Pro383Thr | affect protein function | probably damaging   | Damaging              | BOTH      |
| p.Ile396Asn | affect protein function | possibly damaging   | Damaging              | BOTH      |
| p.Pro446Leu | affect protein function | benign              | Damaging              | SIFT      |
| p.Arg478His | Tolerated               | benign              | Benign                | BOTH      |
| p.Ile500Ser | affect protein function | possibly damaging   | Damaging              | BOTH      |
| p.Arg540Gln | Tolerated               | benign              | Benign                | BOTH      |
| p.His590Tyr | affect protein function | probably damaging   | Benign                | NEITHER   |
| p.Gly607Glu | Tolerated               | possibly damaging   | Damaging              | PolyPhen  |
| p.Arg612Cys | affect protein function | probably damaging   | Damaging              | BOTH      |

Variants were assessed using the SIFT and PolyPhen algorithms (4, 5). Functional assessment was assigned as 'benign' for variants showing WT-like predominant nuclear localization as YFP-fusion proteins in HeLa cells and 'damaging' for variants with cellular and/or kinetic defects.

**Supplemental Table 5.** Conservation of C-terminal residues from GGRP orthologues experimentally validated to localize to the nucleus.

|                      | Overall<br>sequence<br>identity | C-terminal<br>sequence<br>identity | 595 | 605             | 615 | 625 |   |   |   |   |                 |   |   |   |   |                 |                 |                 |                 |   |   |   |   |   |   |   |      |   |       |       |       |       |       |       |       |      |
|----------------------|---------------------------------|------------------------------------|-----|-----------------|-----|-----|---|---|---|---|-----------------|---|---|---|---|-----------------|-----------------|-----------------|-----------------|---|---|---|---|---|---|---|------|---|-------|-------|-------|-------|-------|-------|-------|------|
| <i>H. sapiens</i>    |                                 |                                    | P   | <b><u>S</u></b> | V   | C   | E | A | V | R | <b><u>S</u></b> | A | L | A | G | <b><u>P</u></b> | <b><u>G</u></b> | <b><u>Q</u></b> | <b><u>K</u></b> | R | T | A | D | P | L | E | I    | L | E     | P     | D     | V     | Q     | ----  |       |      |
| <i>R. norvegicus</i> | 89%                             | 62%                                | S   | <b><u>S</u></b> | V   | C   | E | V | V | R | <b><u>S</u></b> | A | L | S | G | <b><u>P</u></b> | <b><u>G</u></b> | <b><u>Q</u></b> | <b><u>K</u></b> | R | S | T | Q | A | L | E | ---- | D | P     | P     | A     | C     | G     | T     | L     | N    |
| <i>M. musculus</i>   | 88%                             | 59%                                | S   | <b><u>S</u></b> | V   | C   | E | V | V | R | <b><u>S</u></b> | A | L | S | G | <b><u>P</u></b> | <b><u>G</u></b> | <b><u>Q</u></b> | <b><u>K</u></b> | R | S | I | Q | A | F | G | ---- | D | P     | V     | V     | P     | ----  | ----  | ----  | ---- |
| <i>X. laevis</i>     | 59%                             | 31%                                | L   | <b><u>S</u></b> | I   | R   | S | A | I | E | <b><u>S</u></b> | S | M | N | V | <b><u>P</u></b> | <b><u>G</u></b> | <b><u>R</u></b> | <b><u>K</u></b> | R | G | A | E | D | S | E | S    | R | ----- | ----- | ----- | ----- | ----- | ----- | ----- |      |

Percentage identities and alignments were calculated using the ClustalW algorithm in MegAlign (Lasergene, DNASTAR). Sequences were from protein BLAST searches with human GGRP (<http://blast.ncbi.nlm.nih.gov/>). Residues conserved in all four species are **bold and underlined**.

**Supplemental Table 6.** Relative activity and maximal response to F1P or F6P of recombinant FLAG-tagged variant GKRP preparations compared to WT GKRP.

| Protein                  | Relative activity | F6P amplitude ratio<br>(WT GKRP / variant<br>GKRP) | F1P amplitude ratio<br>(WT GKRP / variant<br>GKRP) |
|--------------------------|-------------------|----------------------------------------------------|----------------------------------------------------|
| Wild-type                | 1                 | 1                                                  | 1                                                  |
| p.Ile219Val              | 0.88              | N/S <sup>A</sup>                                   | 1.11                                               |
| p.Gln234Pro              | 0.79              | 1.24                                               | 1.13                                               |
| p.Pro383Thr              | 0.97              | N/S                                                | 3.4                                                |
| p.[Pro383Thr; Pro446Leu] | 0.69              | N/S                                                | 3.3                                                |
| p.Pro446Leu              | 0.88              | 1.08                                               | N/S                                                |
| p.Ile500Ser              | 1.03              | 1.25                                               | 2.25                                               |
| p.Arg612Cys              | 1.02              | N/S                                                | N/S                                                |

<sup>A</sup> no significant difference compared to WT GKRP

**Supplemental Table 7.** Modeling kinetic effects of either Pro446 or Leu446 in *trans*.

| Protein                                | Relative concentration<br>required for one unit activity | Relative concentration<br>required for one unit activity,<br>500 $\mu$ M F6P | Relative amplitude of<br>response to F1P |
|----------------------------------------|----------------------------------------------------------|------------------------------------------------------------------------------|------------------------------------------|
| Wild-type                              | 1                                                        | 1                                                                            | 1                                        |
| p.Pro383Thr                            | 1.14                                                     | 1.20                                                                         | 0.39                                     |
| p.Pro446Leu                            | 1.25                                                     | 1.22                                                                         | 0.93                                     |
| p.[Pro383Thr; Pro446Leu]               | 1.34                                                     | 1.42                                                                         | 0.38                                     |
| WT + p.Pro383Thr                       | 1.06                                                     | 1.14                                                                         | 0.71                                     |
| WT + p.[Pro383Thr; Pro446Leu]          | 1.22                                                     | 1.30                                                                         | 0.71                                     |
| p.Pro446Leu + p.Pro383Thr              | 1.20                                                     | 1.26                                                                         | 0.71                                     |
| p.Pro446Leu + p.[Pro383Thr; Pro446Leu] | 1.30                                                     | 1.44                                                                         | 0.69                                     |



**Supplemental Table 8.** Adjusted (least-square) means separated by *GCKR* genotype.

| Baseline measurements     | <i>GCKR</i> WT    | <i>GCKR</i> P446L | <i>GCKR</i> L446  | P446L vs WT | L446 vs WT |
|---------------------------|-------------------|-------------------|-------------------|-------------|------------|
|                           | mean±SEM<br>n=232 | mean±SEM<br>n=312 | mean±SEM<br>n=141 | <i>P</i>    | <i>P</i>   |
| CRP (mg/dL)               | 0.20±0.02         |                   | 0.24±0.02         |             | 0.27       |
| Total cholesterol (mg/dL) | 182.5±2.3         | 190.4±2.0         | 191.3±2.8         | 0.009       | 0.02       |
| HDL cholesterol (mg/dL)   | 58.8±0.9          | 57.7±0.8          | 56.5±1.2          | 0.39        | 0.11       |
| LDL cholesterol (mg/dL)   | 105.6±2.0         | 113.5±1.7         | 113.9±2.4         | 0.003       | 0.01       |
| Triglycerides (mg/dL)     | 94.4±3.5          | 106.8±3.0         | 118.4±4.9         | 0.008       | <0.001     |

| Baseline measurements     | <i>GCKR</i> non-rare | <i>GCKR</i> rare | <i>GCKR</i> LOF  | <i>GCKR</i> rare        | <i>GCKR</i> LOF         |
|---------------------------|----------------------|------------------|------------------|-------------------------|-------------------------|
|                           | mean±SEM<br>n=684    | mean±SEM<br>n=37 | mean±SEM<br>n=16 | Vs non-rare<br><i>P</i> | vs non-rare<br><i>P</i> |
| Total cholesterol (mg/dL) | 187.5±1.3            | 198.8±5.7        | 215.2±8.7        | 0.06                    | 0.002                   |
| HDL cholesterol (mg/dL)   | 57.8±0.5             | 58.0±2.2         | 58.8±3.4         | 0.91                    | 0.76                    |
| LDL cholesterol (mg/dL)   | 110.6±1.2            | 117.9±5.0        | 128.7±7.6        | 0.15                    | 0.02                    |
| Triglycerides (mg/dL)     | 104.8±2.2            | 120.0±9.4        | 153.9±14.4       | 0.12                    | 0.001                   |

For common variant p.Pro446Leu, *GCKR* subgroups were defined as: *GCKR* WT (individuals who are homozygous for Pro at position 446), *GCKR* P446L (individuals who are heterozygous for p.Pro446Leu), and *GCKR* L446 (individuals who are homozygous for Leu at position 446). For rare *GCKR* variants, *GCKR* subgroups were defined as: *GCKR* non-rare (individuals without rare *GCKR* nonsynonymous variants), *GCKR* rare (individuals with one or more rare *GCKR* nonsynonymous variants), and *GCKR* LOF (individuals with putative rare *GCKR* loss-of-function nonsynonymous variants).

**Supplemental Table 9.** P-trend regression effect estimates separated by *GCKR* genotype.

| Dependent variable        | Leu446 allele<br>est±SEM<br>n=453 | Rare<br>est±SEM<br>n=37 | Rare, WT-like<br>est±SEM<br>n=19 | Rare, LOF<br>est±SEM<br>n=16 | Leu446<br>Allele<br><b>P</b> | Rare<br><b>P</b> | Rare,<br>WT-like<br><b>P</b> | Rare,<br>LOF<br><b>P</b> |
|---------------------------|-----------------------------------|-------------------------|----------------------------------|------------------------------|------------------------------|------------------|------------------------------|--------------------------|
| Fasting glucose (mg/dL)   | -0.19±0.5                         | -0.78±1.5               | 0.81±2.0                         | -2.05±2.2                    | 0.68                         | 0.60             | 0.69                         | 0.36                     |
| Fasting insulin (mcU/mL)  | -0.21±0.3                         | 0.22±0.9                | -1.94±1.2                        | 2.85±1.4                     | 0.48                         | 0.82             | 0.12                         | 0.04                     |
| C-peptide (ng/mL)         | -0.02±0.1                         | -0.24±0.2               | -0.30±0.2                        | -0.19±0.2                    | 0.66                         | 0.13             | 0.18                         | 0.41                     |
| CRP (mg/dL)               | 0.02±0.02                         | -0.02±0.06              | 0.06±0.08                        | -0.11±0.1                    | 0.32                         | 0.73             | 0.48                         | 0.23                     |
| Total cholesterol (mg/dL) | 4.21±1.8                          | 11.54±5.9               | 1.76±8.0                         | 27.29±8.8                    | 0.02                         | 0.05             | 0.83                         | 0.002                    |
| HDL cholesterol (mg/dL)   | -1.06±0.7                         | 0.41±2.3                | 0.94±3.1                         | 1.15±3.4                     | 0.13                         | 0.86             | 0.76                         | 0.74                     |
| LDL cholesterol (mg/dL)   | 4.05±1.6                          | 7.05±5.1                | -0.01±7.0                        | 17.49±7.7                    | 0.01                         | 0.17             | 1.00                         | 0.02                     |
| Triglycerides (mg/dL)     | 11.3±3.0                          | 15.0±9.8                | -11.4±13.1                       | 50.09±14.7                   | <0.001                       | 0.13             | 0.38                         | <0.001                   |

The ClinSeq™ cohort was analyzed using P-trend linear regression to estimate the effect of the *GCKR* Leu446 allele or rare *GCKR* nonsynonymous variants. Rare *GCKR* variants were further subdivided into WT-like and LOF subgroups (see Table 2).

**Supplemental Table 10.** Results from genotyping of selected rare *GCKR* variants from the ClinSeq™

cohort.

| Amino acid change             | Nucleotide change       | n (heterozygotes) | n (genotyped) | Ethnicity        |
|-------------------------------|-------------------------|-------------------|---------------|------------------|
| p.Val103Met                   | c.307G>A                | 0                 | 8524          | Finns            |
|                               |                         | 28                | 1528          | Mexican-American |
| p.[Ser183CysfsX34; Ala519Thr] | c.[548_549del; 1555G>A] | 0                 | 12168         | Finns/Germans    |
|                               |                         | 15                | 1206          | Ashkenazi        |
| p.Gln234Pro                   | c.701A>C                | 2                 | 9728          | Finns            |
|                               |                         | 4                 | 1868          | Germans          |
| p.Thr379AsnfsX36              | c.1135dup               | 7                 | 10299         | Finns            |
|                               |                         | 7                 | 1864          | Germans          |

**Supplemental Table 11.** Genotyping results of severe loss-of-function variants separated by glycemic status.

| Amino acid change                | Nucleotide change          | n (T2D) | Frequency (T2D) | n (IGT/IFG) | Frequency (IGT/IFG) | n (controls) | Frequency (controls) | <i>p</i> (chi-square) <sup>A</sup> |
|----------------------------------|----------------------------|---------|-----------------|-------------|---------------------|--------------|----------------------|------------------------------------|
| p.Val103Met                      | c.307G>A                   | 16      | 0.0203          | 8           | 0.0237              | 4            | 0.0093               | 0.17                               |
| p.[Ser183CysfsX34;<br>Ala519Thr] | c.[548_549del;<br>1555G>A] | 13      | 0.007           | N/A         | -                   | 2            | 0.0036               | 0.60                               |
| p.Thr379AsnfsX36                 | c.1135dup                  | 7       | 0.0027          | 4           | 0.0022              | 5            | 0.0008               | 0.036                              |

<sup>A</sup> two-tailed chi-square tests were used to compare the frequency of variants in controls to frequency of variants in individuals with impaired glycemia

[type 2 diabetes, impaired glucose tolerance (IGT), or impaired fasting glucose (IFG)]

## Supplemental methods

### **GCKR sequencing primers**

| Primer name  | Forward primer           | Primer name  | Reverse primer         | Exon   | Amplicon size |
|--------------|--------------------------|--------------|------------------------|--------|---------------|
| GCKR-F1      | CTCTTCAGGGGCCAAAGC       | GCKR-R1      | ATTGCCCTAGCAGTCGAACA   | 1      | 700           |
| GCKR-F2      | TCTTTCCCTAATATGCCAGAG    | GCKR-R2      | GAACTTTCCCAGCCACCTGTA  | 2      | 544           |
| GCKR-F3      | AAGCCCTGTCCACATACCAG     | GCKR-R3      | ACCAGTTTGACTCCCATGTCTT | 3      | 700           |
| GCKR-F4, 5   | CATTGCATGTATTTGTTCAATTTT | GCKR-R4, 5   | AACTTGGCTTACCTGTCACCAC | 4      | 698           |
| GCKR-F5, 6   | TGCGAGATTCCATGTAGGACT    | GCKR-R5, 6   | GAATGCTGGGGCTTTTATGTC  | 5, 6   | 700           |
| GCKR-F6, 7   | GAGTGTCTATCATGCACCAACAA  | GCKR-R6, 7   | TAGAATCCCTTCCCCATCTTC  | 6, 7   | 642           |
| GCKR-F8      | GCATTCTGAAGGGTTCTGATGC   | GCKR-R8      | CTCTTGCCTCTTCAATCCCTG  | 8      | 462           |
| GCKR-F9      | GCCTCTAAAAGTTCCAAAGCATA  | GCKR-R9      | CTAAGAAGGGCCACCCAATTTT | 9      | 687           |
| GCKR-F10     | GGCCCTTCCCCTCTTTCTAA     | GCKR-R10     | CAGGCTCAGGGATTAGGTCTG  | 10     | 532           |
| GCKR-F11, 12 | CTGCACTCGTCCCCTTTTCT     | GCKR-R11, 12 | CGAATGGTTGGGATCAGGAG   | 11, 12 | 677           |
| GCKR-F12, 13 | CATGGTTTGTGACTCCTGTGT    | GCKR-R12, 13 | CTTTTCTTCCACCCTCAGCAC  | 12, 13 | 680           |
| GCKR-F13, 14 | CACAAGGGCTACTCCTCACTCT   | GCKR-R13, 14 | ACCACTCCCATCTTCCCTCT   | 13, 14 | 699           |
| GCKR-F14     | CTTAGCATGGGCAGTGTGGA     | GCKR-R14     | CTGGATGTGGTTGGTCTTCTCT | 14     | 580           |
| GCKR-F15, 16 | CTGGATGGTGAGAGGGAAGAT    | GCKR-R15, 16 | CCCTACAGCCTTGGGTTTTT   | 15, 16 | 566           |
| GCKR-F17     | CCTGGTTTACATCTATTGCCCTA  | GCKR-R17     | AAAAAGAATGAGAGCAACACAG | 17     | 700           |
| GCKR-F18     | CCAGTTTAACCCAGCCAGTC     | GCKR-R18     | AAAAACAGAACCCTGGAGGA   | 18     | 672           |
| GCKR-F19     | GGGGTTCTTTCTCTGATGACCT   | GCKR-R19     | GTGTCTGTGTGGGATTGGAGT  | 19     | 699           |

### **Generation of CFP-GCK and YFP-GKRP vectors**

The GFP ORF from pcDNA-DEST53 was removed by restriction digest with *SacI* (all enzymes New England Biolabs), blunting with Klenow polymerase, and phenol-chloroform: ethanol precipitation followed by DNA purification, subsequent digest with *NdeI*, and gel-purification of the 6.5kb fragment using a QIAquick gel extraction kit according to the manufacturer's instructions (QIAGEN).

pZsYellow1-c1 and pAmCyan1-c1 were cut with *BglIII*, blunted with Klenow polymerase, phenol-chloroform: ethanol precipitated, purified, cut with *NdeI*, and the 1.1kb fragment was gel-purified. The ZsYellow1 fragment or the AmCyan1 fragment were ligated to the 6.5kb fragment overnight at 12°C with T4 DNA ligase according to the manufacturer's instructions and then transformed into DB3.1

competent cells (Invitrogen) to generate Gateway expression vectors encoding N-terminal YFP or CFP.

### Generation of CFP-GCK + pZsYellow1-c1 Gateway co-expression vector

The CFP-GCK promoter, ORF, and polyA signal were removed by digestion with NaeI and NruI. The resulting fragment was cloned into the ZsYellow1-c1 Gateway destination vector using a unique BglII site that was blunted with Klenow polymerase. Insertion orientation was verified by sequencing.

### Gateway primer sequences

|                                      |                                                       |
|--------------------------------------|-------------------------------------------------------|
| Human <i>GCKR</i> attB1              | GGGGACAAGTTTGTACAAAAAAGCAGGCTTAATGCCAGGCACAAAACGGTTT  |
| Human <i>GCKR</i> attB2              | GGGGACCACTTTGTACAAGAAAGCTGGGTTCACCTGAACGTCAGGCTCTAG   |
| <i>Xenopus GCKR</i> attB1            | GGGGACAAGTTTGTACAAAAAAGCAGGCTTGATGAGAGGCACAAGGAAGTATC |
| <i>Xenopus GCKR</i> attB2            | GGGGACCACTTTGTACAAGAAAGCTGGGTTCATCGACTCTCCGAGTCC      |
| Human $\beta$ -cell <i>GCK</i> attB1 | GGGGACAAGTTTGTACAAAAAAGCAGGCTTAATGCTGGACGACAGAGCCAGG  |
| Human liver <i>GCK</i> attB1         | GGGGACAAGTTTGTACAAAAAAGCAGGCTTAATGGCGATGGATGTCACAAGG  |
| <i>GCK</i> attB2                     | GGGGACCACTTTGTACAAGAAAGCTGGGTTCACCTGGCCCAGCATACAGG    |

### Site-directed mutagenesis primer sequences

|                         |                                     |
|-------------------------|-------------------------------------|
| p.Arg51Gln <sup>A</sup> | CTGAGAACATTGTTCAACTGCTAGGGCAATG     |
| p.Glu77Gly              | GAGACTCTACAGCGGATCCATTCTGACC        |
| p.Val103Met             | CAGATGGGGGGCTGGTTATGCTGAGTGCAG      |
| p.Ser183CysfsX34        | CTGTGGGACTCTGCTCCCTTTGTGG           |
| p.Ile219Val             | CCAGAAATGACCCCGTTGAAGACTGGAG        |
| p.Gln234Pro             | AGTAGCAGAGCGGATGCCGAAAATGCAGGAGAAAC |
| p.Tyr307Asp             | CATCAGGTGACCGACAGCCAAAGCC           |
| p.Thr379AsnfsX36        | AGAAGGCTGAGCTCAACCAACCAGGGTCC       |
| p.Pro383Thr             | AGCTACCAACCAGGGTACCCAGTTCACC        |
| p.Ile396Asn             | GAGGACTTCCTGACTTCCAACCTTCCCTCTCT    |
| p.Pro446Leu             | GTGGGTGACACCTTGCTGATCCCTCTGAAGAAG   |
| p.Arg478His             | CCAGAAGTTCAGCATGAGCTAAGCACC         |
| p.Ile500Ser             | GTGCTTCTTGGTAAGAGCCTACAAAACCATG     |

|             |                                   |
|-------------|-----------------------------------|
| p.Arg540X   | CATCGAGAGCCTCCTCTGAGCGATCCACTTTC  |
| p.Arg540Gln | GAGAGCCTCCTCCAAGCGATCCACTTTC      |
| p.His590Tyr | GAGGCTCAGGCATACCTGGCTGCAG         |
| p.Gly607Glu | GAGTGCTCTTGCTGAGCCAGGTCAGAAGC     |
| p.Gly607Val | GTGCTCTTGCTGTGCCAGGTCAGAAG        |
| p.Pro608Ala | GCTCTTGCTGGGGCAGGTCAGAAGC         |
| p.Gly609Ala | CTTGCTGGGCCAGCTCAGAAGCGCACTG      |
| p.Gln610Ala | TGCTGGGCCAGGTGCGAAGCGCACTGCG      |
| p.Gln610Arg | CTTGCTGGGCCAGGTCGGAAGCGCACTGCGGAC |
| p.Lys611Ala | TGGGCCAGGTCAGGCGCGCACTGCGGAC      |
| p.Arg612Cys | GCCAGGTCAGAAGTGCCTGCGGACCC        |

<sup>A</sup> Forward PCR primer shown only; reverse primers were the reverse complement of forward primers.

## Covariate adjustment for least-square means calculations

|                   | P446L vs WT                                    | L446 vs WT                                     | Rare vs non-rare                                               |
|-------------------|------------------------------------------------|------------------------------------------------|----------------------------------------------------------------|
| Total cholesterol | sex, age at enrollment, statin use, niacin use | sex, age at enrollment, statin use, niacin use | sex, Leu446 alleles, age at enrollment, statin use, niacin use |
| LDL cholesterol   | sex, BMI, statin use, niacin use               | sex, BMI, statin use, niacin use               | sex, Leu446 alleles, BMI, statin use, niacin use               |
| HDL cholesterol   | sex, age at enrollment, BMI, statin use        | sex, age at enrollment, BMI, statin use        | sex, Leu446 alleles, age at enrollment, BMI, statin use        |
| Triglycerides     | sex, race, BMI, statin use, niacin use         | sex, race, BMI, statin use, niacin use         | sex, race, Leu446 alleles, BMI, statin use, niacin use         |
| CRP               |                                                | sex, BMI, statin use                           |                                                                |

## Cohort characteristics for Mexican-American population

|                           | Cases       | Impaired FG/GT | Controls   |
|---------------------------|-------------|----------------|------------|
| No.                       | 790         | 338            | 428        |
| Sex (% Female)            | 60.1        | 75.4           | 68.5       |
| Age in years <sup>A</sup> | 46.7 ± 10.9 | 41.5 ± 10.5    | 37.5 ± 8.9 |
| BMI (kg/m <sup>2</sup> )  | 31.8 ± 6.4  | 31.0 ± 5.9     | 29.5 ± 6.5 |
| A1c (%)                   | 10.9 ± 3.7  | N/A            | N/A        |

<sup>A</sup> Age at diagnosis for cases; age at examination for controls

Data presented are mean ± SD

## Cohort characteristics for Ashkenazi population

|                           | Cases       | Controls    |
|---------------------------|-------------|-------------|
| No.                       | 951         | 278         |
| Sex (% Female)            | 52.2        | 38.2        |
| Age in years <sup>A</sup> | 46.7 ± 10.8 | 57.3 ± 22.3 |
| BMI (kg/m <sup>2</sup> )  | 30.0 ± 5.6  | 25.4 ± 4.2  |
| A1c (%)                   | 7.9 ± 1.5   | N/A         |

<sup>A</sup> Age at diagnosis for cases; age at examination for controls

Data presented are mean ± SD



## **Supplemental References**

1. Veiga-da-Cunha, M., and Van Schaftingen, E. 2002. Identification of fructose 6-phosphate- and fructose 1-phosphate-binding residues in the regulatory protein of glucokinase. *J Biol Chem* 277:8466-8473.
2. Rost, B., and Sander, C. 1993. Prediction of protein secondary structure at better than 70% accuracy. *J Mol Biol* 232:584-599.
3. Kim, Y., Quartey, P., Ng, R., Zarembinski, T.I., and Joachimiak, A. 2009. Crystal structure of YfeU protein from *Haemophilus influenzae*: a predicted etherase involved in peptidoglycan recycling. *J Struct Funct Genomics* 10:151-156.
4. Ramensky, V., Bork, P., and Sunyaev, S. 2002. Human non-synonymous SNPs: server and survey. *Nucleic Acids Res* 30:3894-3900.
5. Ng, P.C., and Henikoff, S. 2001. Predicting deleterious amino acid substitutions. *Genome Res* 11:863-874.
